# Supplementary material for: Selective whole genome amplification of Plasmodium malariae DNA from clinical samples reveals insights into population structure
Source: PubMed Central journal article supplement (PMC7331648; doi:10.1038/s41598-020-67568-4), 2020-07-02
Supplement: 41598_2020_67568_MOESM1_ESM.pdf [file 41598_2020_67568_MOESM1_ESM.pdf]

## Selective Whole Genome Amplification of *Plasmodium malariae* DNA from clinical samples reveals insights into population structure

Amy Ibrahim<sup>1</sup>, Ernest Diez Benavente<sup>1</sup>, Debbie Nolder<sup>1,2</sup>, Stephane Proux<sup>3</sup>, Matthew Higgins<sup>1</sup>, Julian Muwanguzi<sup>1,2</sup>, Paula Josefina Gomez Gonzalez<sup>1</sup>, Hans-Peter Fuehrer<sup>4</sup>, Cally Roper<sup>1</sup>, Francois Nosten<sup>3,5</sup>, Colin Sutherland<sup>1</sup>, Taane G. Clark<sup>1,6</sup>, Susana Campino<sup>1</sup>

### SUPPLEMENTARY INFORMATION

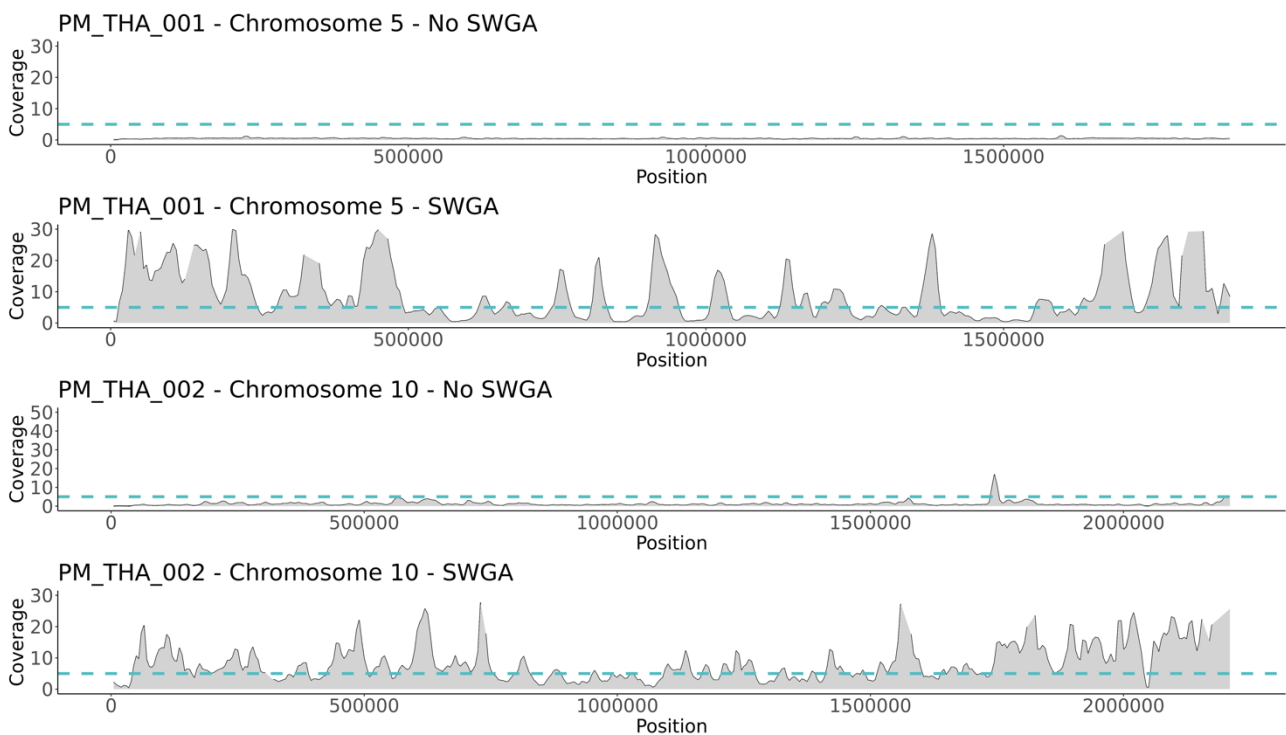

**S1 Fig. Genome coverage is increased after SWGA.** The top two plots show the coverage (as measured by the number of sequencing reads at each position) of chromosome 5 for sample PM\_THA\_001 before (No SWGA) and after amplification with Pmset1 (SWGA). The same comparison is shown below with chromosome 10 for sample PM\_THA\_002. Coverage was calculated using a sliding window of 10 kb. The horizontal y-intercept indicates a coverage of 5-fold which is recommended for confident SNP calling.

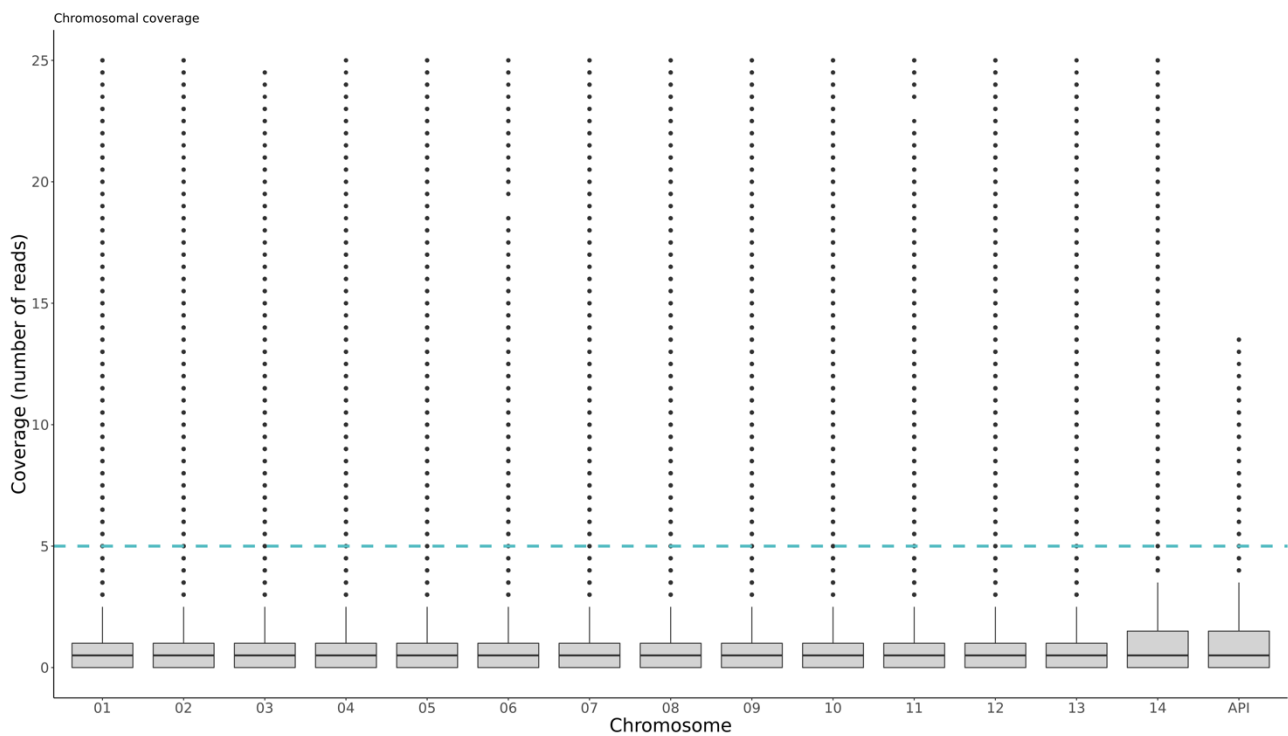

**S2 Fig. Sequencing coverage by chromosome without amplification.** The distribution of coverage for each position within the genome between two unamplified samples (PM\_THA\_001 and PM\_THA\_002), among the 14 nuclear chromosomes and the organellar apicoplast genome. The blue horizontal dashed line represents a cut-off of coverage of 5-fold which is recommended for SNP calling. Outliers are denoted by a black circle, many individual positions will have a coverage of 5-fold, but the majority of the genome falls below this.

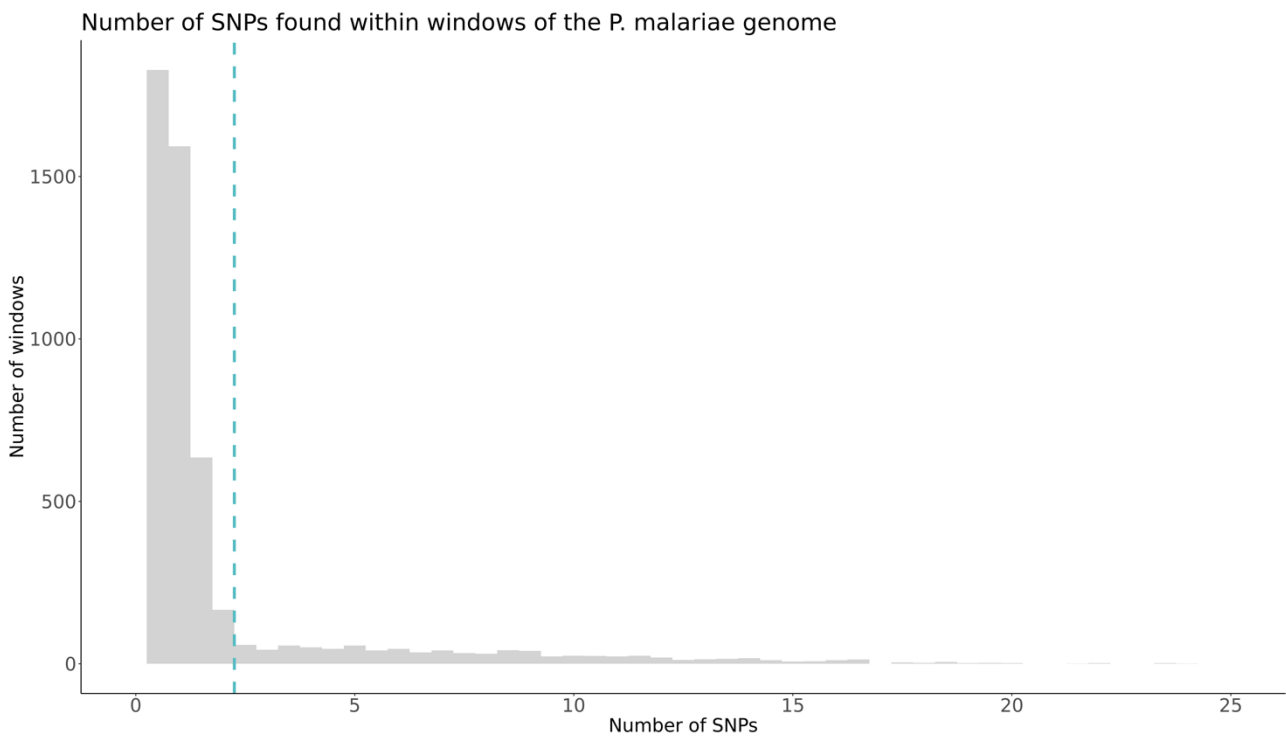

**S3 Fig. Number of SNPs seen within 5 kb windows of the *P. malariae* genome.** An average of the number of SNPs seen within all 18 samples was generated for 5 kb sliding windows across the entire genome. The distribution of SNPs within each window is shown. The blue dashed x-intercept is at 2.25 SNPs which is used as the limit of SNPs per window for the core genome.

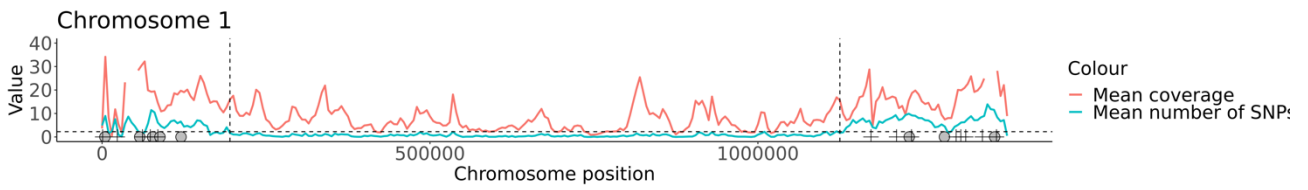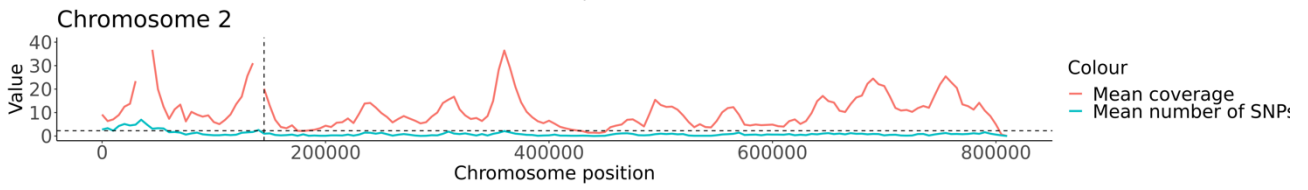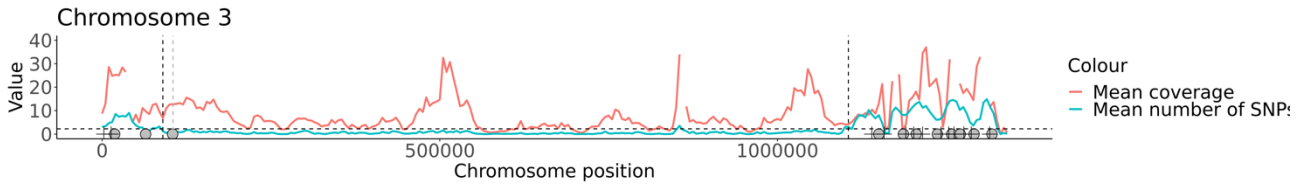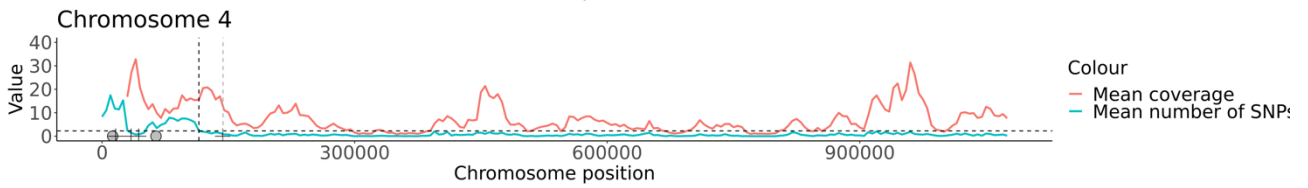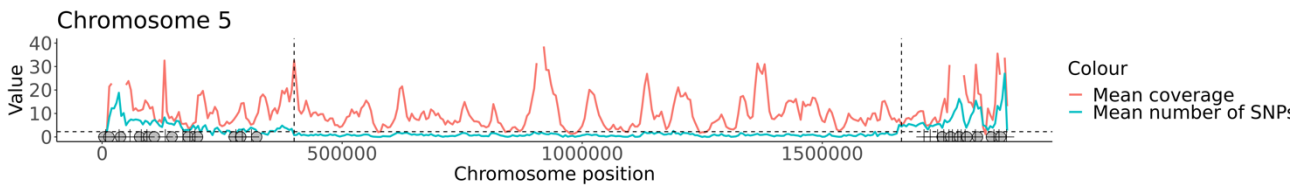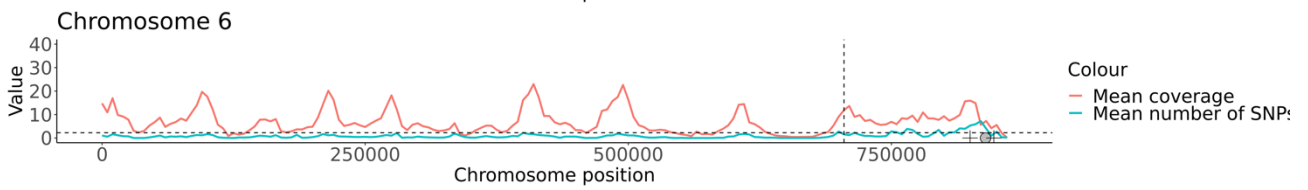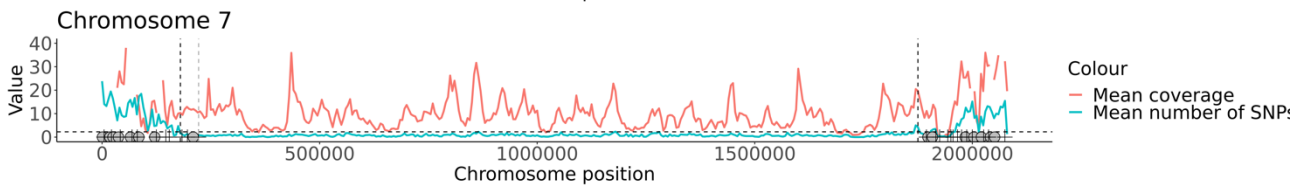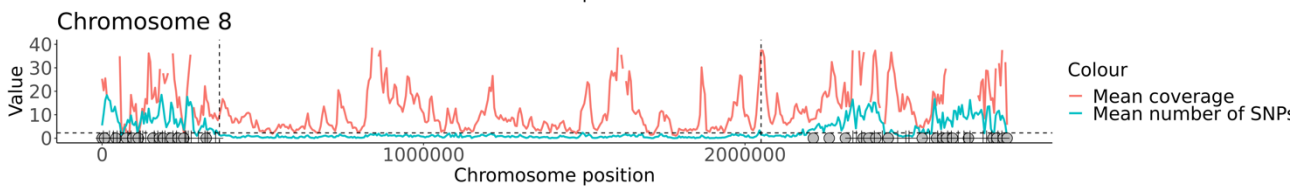

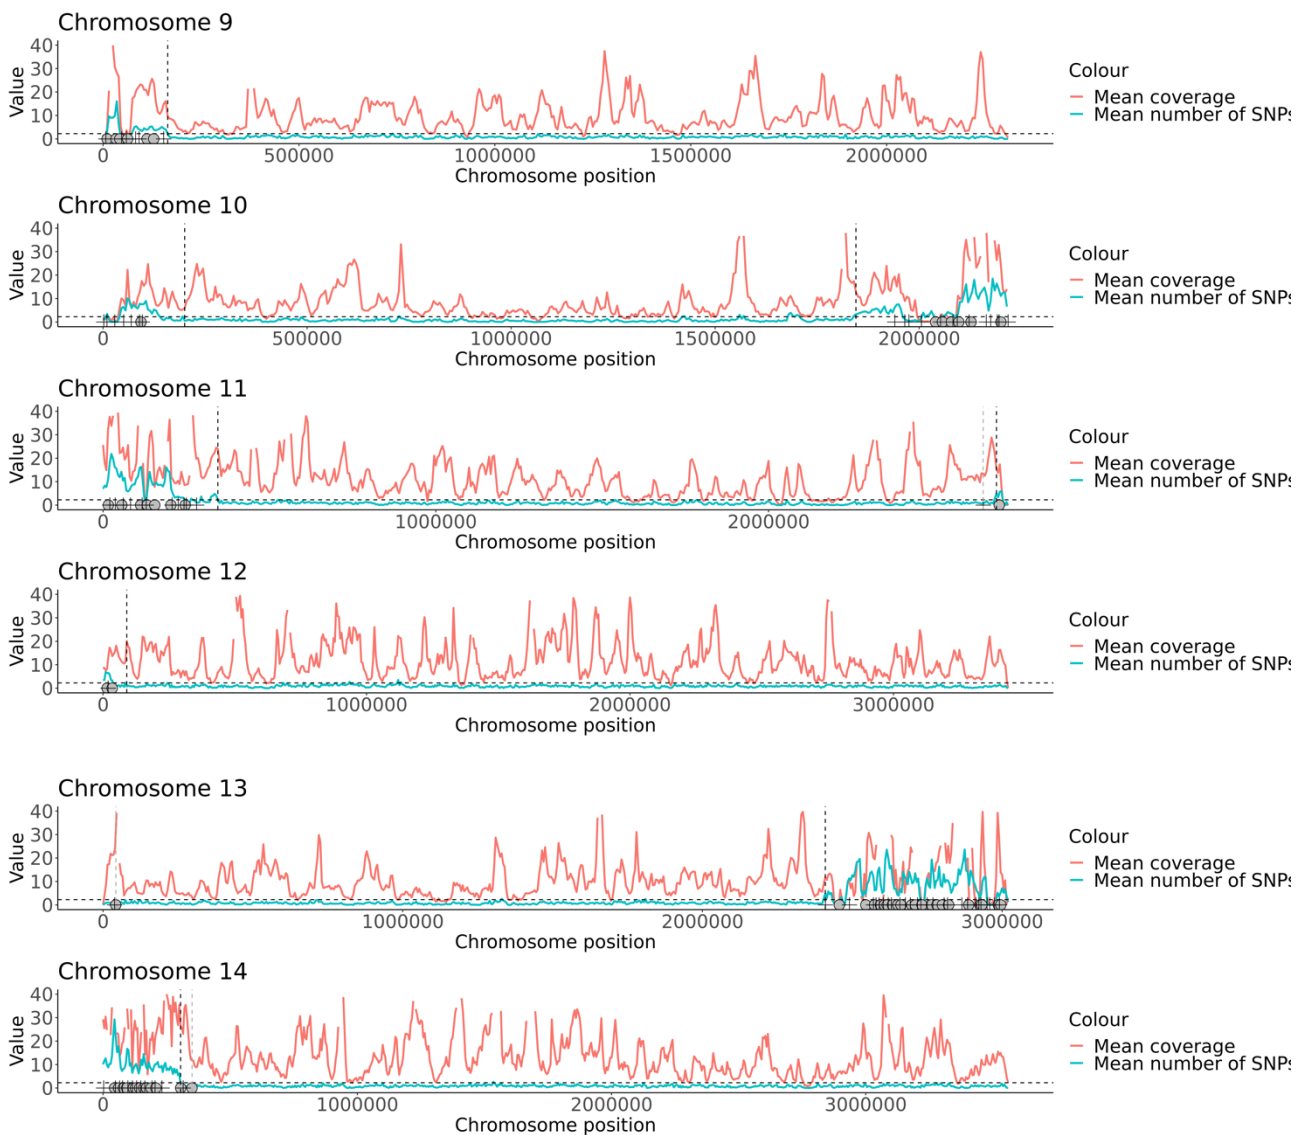

**S4 Fig. Determining and excluding hypervariable subtelomeric regions.** The average coverage (pink) and number of SNPs (blue) between all 18 samples for each nuclear chromosome. The black dashed horizontal line demonstrates the previously chosen SNP limit per 5 kb window (as defined in **S3 Fig.**). Black dashed lines are placed at the suggested hypervariable region cut-off points, where clusters of windows demonstrating  $>2.25$  SNPs are seen. The midpoints of *Pm-fam* gene families are annotated; *Pm-fam-I* gene positions are denoted by a black plus, whilst *Pm-fam-m* gene positions are denoted with a grey circle. There are cases where *Pm-fam* gene families are located outside of the hypothesised hypervariable regions using the 2.25 SNP limit per window, and in these instances, the terminal or initial position of the *Pm-fam* gene is located with a grey dashed line and this is used as the amended hypervariable cut-off position (see **S3 Table** for coordinates).

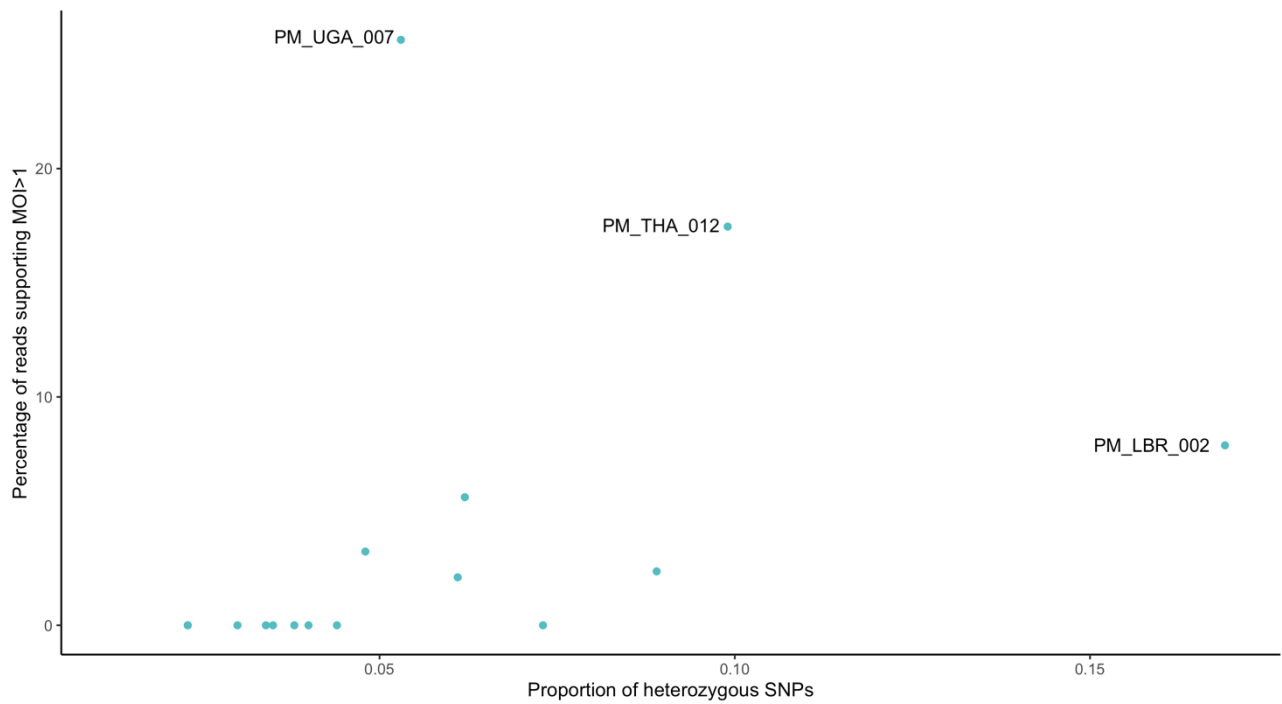

**S5 Fig. Determining multiplicity of infection (MOI).** EstMoi was ran for all sequenced samples, values were obtained for 18 samples (not including PM\_KEN\_001, PM\_LBR\_003 and PM\_UGA\_001 which did not have sufficient SNP density for estMOI) (**S2 Table**). Three samples appear to separate from the main cluster of samples (PM\_LBR\_002, PM\_THA\_012 and PM\_UGA\_007).

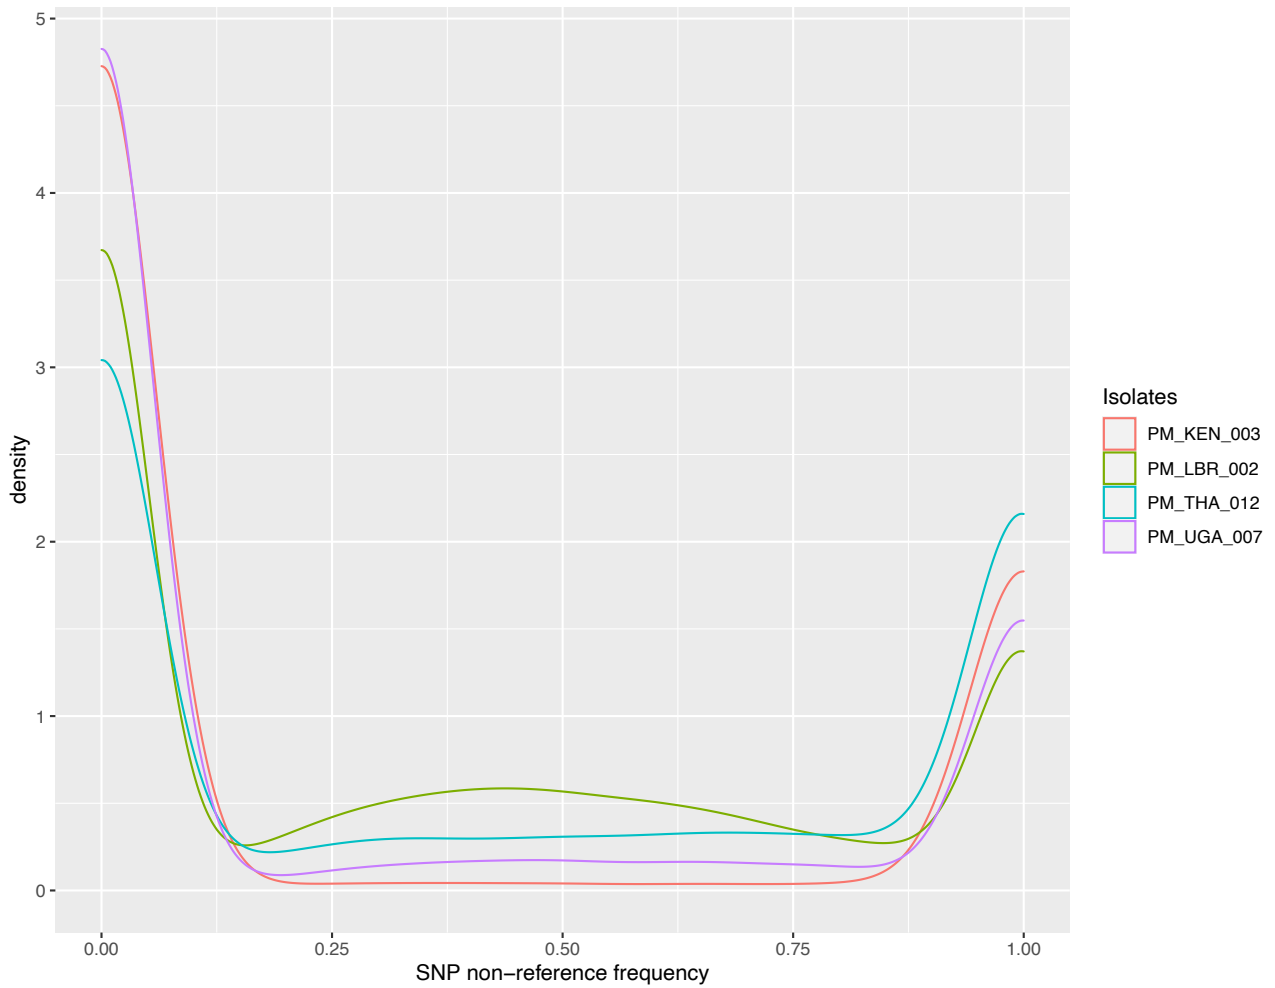

**S6 Fig. Density plot of non-reference MAF distribution for isolates with MOI>1.**

Distribution (density plot) of non-reference minor allele reference (MAF) for isolates with MOI>1 according to estMOI (PM\_LBR\_002, PM\_THA\_012, PM\_UGA\_007). Isolate PM\_KEN\_003 did not present evidence of MOI>1 and has been included as reference. The density (y-axis) is scaled so that the area under the curve adds up to 1.

A)

```
PmUG01_05034700/1-621 1 - MEDLAD I FDIYA I CACCKVP NOGEGKKNE I FSTKTFRGLNGKGLPWKSNLSLDMKYF S VTTTYVNEKMKYKLYKREKYLEKE I SENSSTVFEN I SLLSS KLVN VVV 109
PF3D7_0417200/1-608 1 MMEQVCDVDF IYA I CA CCKVESKNEGKKEVFNNTYFRGLNGKGLVLPWK C S LDMKYF S AVTTTYVNESKYEKLYKREKYLEKLNKETVDNV - - - - - NDMPNSKLVN VVV 103

PmUG01_05034700/1-621 110 MGR S WWS I PKQYKPLNRR I NVVLSRLLKKEDEKED I F I INNMDOVL L L L KLNYYKCF I IGGA I VYKECLERN I KQ I YFTR I NNVECDVFFPE I DENVFO I TSVSDV 219
PF3D7_0417200/1-608 104 MGR T S WES I PKKFKPLSNRR I NV I LSRLLKKEDEKEDVY I INKVED I V L L GKLNYKCF I I GGSVVYQEF I LEKLL I K I YFTR I NSTYECVDFPE I INENEYQ I ISVSDV 213

PmUG01_05034700/1-621 220 YTSNCTSLDFV I I SRRK KALTOESLPHOSSGSDKGSNTSST I SNGAMSSNT I RGS I TSSSGKGGGGS I FEREYFMGDEEDDLVYFNFNKNNE - YKNAENANDFK I Y 328
PF3D7_0417200/1-608 214 YTSNNTLDFE I I YKKTNNKMLNEQNC I K - - GEEKNN - - DMP LKNDKDTCHMKKLEF - - - - YKNDVKYK I NYENDDDEEEDDFYFNFNKEKEEKNS I HPNDFQ I Y 315

PmUG01_05034700/1-621 329 NSLKF KHP EYQYLS I I YD I I MNGNKQNDRTGVGVL SKFGY I MKFNLDYFP L L TTKLFLRG I IEELLWF I RGETNGNTLLNKNVR I WEANGTREFLDNRKLFHREVND 438
PF3D7_0417200/1-608 316 NSLKYKHP EYQYLN I YD I MNGNKQSDRTGVGVL SKFGY I MKFDLSQYFP L L TTKLFLRG I IEELLWF I RGETNGNTLLNKNVR I WEANGTREFLDNRKLFHREVND 425

PmUG01_05034700/1-621 439 LGP I YGFQWRHFGAEYTNM YNEDKGV DQ LKNI I H L I KNDPTSRRI I LCAWNVKLDQMALPPCH I LCOFYVFDGKLS C I MYQRS CDLGLGVFPN I ASYS I FTHM I AQV 548
PF3D7_0417200/1-608 426 LGP I YGFQWRHFGAEYTNM YNENKGV DQ LKNI I NL I KNDPTSRRI I LCAWNVKLDQMALPPCH I LCOFYVFDGKLS C I MYQRS CDLGLGVFPN I ASYS I FTHM I AQV 535

PmUG01_05034700/1-621 549 CNLQPAQF I H I LGNAHYVNNH I DSKLVQ LNR I PYPFPTLKL NPE I KNI I E DFT I S DFT I QNYVH H K I SMDMAA 621
PF3D7_0417200/1-608 536 CNLQPAQF I H V L GNAHYVNNH I DSKL I Q LNR I PYPFPTLKL NPD I KNI I E DFT I S DFT I QNYVH H E K I SMDMAA 608
```

B)

```
PmUG01_10021600/1-1461 1 M K K D Q N Y K D G S N L S I K D E V E K E L N K K G T L E L F R K I K S O N I S F F L P F K C L P S S H K K L L G I A F I C A T I S G G T L P F F I S V F G D I M K N N M L G E D I N E I I L S L V L I G I F Q F I L 109
PF3D7_0523000/1-1419 1 M G E Q K E K - K O G L N S I K E E V E K E L N K K S T A E L F R K I K N E K I S F F L P F K C L P A Q H R K L L F I S E V C A V L S G G T L P F F I S V F G V I L K N N I L G D I N P I I L S L V S I G L V F I L 108

PmUG01_10021600/1-1461 110 S F I S S F C M D V T T K I L K T L K I E F I K S V Y Q D Q G F H D N N S G S K L S D L E F Y L E Q V N A G I G T K F I F T Y A S S F L G L Y L W S F K N V R L T L C I T C V F P L I Y M C G V I C N K K V R 218
PF3D7_0523000/1-1419 109 S M I S S Y C M D V I T S K I L K T L K L E Y L R S V Y Q D Q G F H D N N P G S K L S D L E F Y L E Q V S S G I G T K F I F T Y A S S F L G L Y I W S L I K N A R L T L C I T C V F P L I Y V G V I C N K K V K 217

PmUG01_10021600/1-1461 219 N K K T S L L Y N N N T M S I I E E A L V G I R T V S Y C G E N I I L R F K L S E K M Y S K Y M L K A N F M E S L H V B L I N G F I L V S Y A F G F W Y G T R I I I S D M R K S I N N D F H G S V I S L L G V 327
PF3D7_0523000/1-1419 218 L N K K T S L L Y N N N T M S I I E E A L M G I R T V A S Y C G E K T I L N K F N L S E T F Y S K Y I L K A N F V E A L H I G L I N G L I L V S Y A F G F W Y G T R I I I S A T N Q Y P N N D F N G A S V I S I L L G V 326

PmUG01_10021600/1-1461 328 L I S M F M L T I I L P N I S E Y M K S L E A T N N L Y E I I N R K P L I E S S G N T G D V L P D I I N K I O F K N V K F H Y D T R K D V E V Y K N L N F T L T E G K T Y A F V G E S G C K S T I L K L I E R I Y D P T O 436
PF3D7_0523000/1-1419 327 L I S M F M L T I I L P N I T E Y M K A L E A T N S L Y E I I N R K P L V E N N - D D G E T L P N I K K I E F K N V R F H Y D T R K D V E I Y K D L S F T L K E G K T Y A F V G E S G C K S T I L K L I E R L Y D P T E 434

PmUG01_10021600/1-1461 437 G D I I I N D S H N L K D V N L K W W R S K I G V V S O D P L L F S N S I K N N I K Y S L S I O D L E Y I Q N G D N D H K M D N D N D E N T N K R C T N K C T K O F N D I I K T N R T S D L L E V K K A Y E S I D D S 545
PF3D7_0523000/1-1419 435 G D I I I N D S H N L K D I N L K W W R S K I G V V S O D P L L F S N S I K N N I K Y S L S L K D L E A M E N Y Y E E N - - - - - T N D T Y - - - E N K N F S L I S N S M T S N E L L E M K K E Y Q T I K D S 530

PmUG01_10021600/1-1461 546 Q V I N V S K K V L I H D F V S A L P D K Y D T M V G S N A S K L S G G Q K O R I S I A R A I I R N P K I L I D E A T S S L D N K S E Y L V O K T I N N L K G N E N R I T I I I A H R L S T I R Y A N T I F V L S N R E 654
PF3D7_0523000/1-1419 531 D V D V S K K V L I H D F V S L P D K Y D T L V G S N A S K L S G G Q K O R I S I A R A I M R N P K I L I D E A T S S L D N K S E Y L V O K T I N N L K G N E N R I T I I I A H R L S T I R Y A N T I F V L S N R E 639

PmUG01_10021600/1-1461 655 N N N M G S H S S I P Y D A A D H S S N N N P I N N L G S Y I E O G T H D S L M K N K G I Y Y S M I N N Q V S S N R S N K G S D D N D S E R K S S V Y K D S D V G N D N E S I Y N N N S M L N N A N G E G A S 763
PF3D7_0523000/1-1419 640 R S D N N N N N N - N D N N N N N N N N N K I N N E G S Y I E O G T H D S L M K N K G I Y H L M I N N Q I S N K S S N G N D N G S D N K S S A Y K D S D T G N D A N M N S L S I H - - - - - E N E N I S 741

PmUG01_10021600/1-1461 764 K N K - D M E L S T N G E E K V S F F K R I F R R K T K G P N N L R V V Y K E M F S Y R K D V F I I V L S I I V A G G L Y P L F A I L Y A K Y V T T L F D F A N L E K S N K Y S L Y I F I I A I A M F I S E T L K N 871
PF3D7_0523000/1-1419 742 N R N K N T A E N E K E E K V P F F K R M F R R K - K K A P N N L R I Y K E I F S Y K K D V T I I F S I L V A G G L Y P V F A L L Y A R Y V S T L F D F A N L E Y S N K Y S I Y I L I A I A M F I S E T L K N 849

PmUG01_10021600/1-1461 872 Y Y N N I I G E K V E K T M K L R L F E N I L H Q E I S F F D H D M N A P L L T H I N R D V H L L K T G L V N N T V I F T H F I V L F L V S M V I S F Y F C P I V A A V L T G T Y F I L M R V F A I R A R L S K S K G 980
PF3D7_0523000/1-1419 850 Y Y N N I I G E K V E K T M K R L F E N I L Y Q E S F F D O Q K N T P G V L S A H I N R D V H L L K T G L V N N I V I F S H F I M L F L V S M V M S F Y F C P I V A A V L T F I Y F I N M R V F A V R A R L T K S K E 958

PmUG01_10021600/1-1461 981 I E E K R N N Y S N T A F V Y N S D D E I F K D P N F L I Q E A F Y N M N T V I T Y G L E E Y F C K L I E K A I D Y S N K G Q K R I I V N S I L W G F S Q S A Q I F V N S F A Y W F G S L L I R R G T I E V D D F M K 1089
PF3D7_0523000/1-1419 959 I E K K E N M - - S G G V F A F S D D E M F K D R S F L I Q E A F Y N M H T V I N Y G L E O Y F C N L I E K A I D Y K N G Q K R R I I V N A A L W G F Q S A Q L I I S F A Y W F G S F L I K R G T I L V D D F M K 1065

PmUG01_10021600/1-1461 1090 S L F T F L T G S Y A G K L M S L K G D S E S A K A S F E K Y Y P L I M R K S N I D V R D V G G I R I K N I D D I K G K I E I K D V N F R Y I S R P N V P I Y K D L S F T C E S K K T T A I V G E T G S G K S T V M S I 1198
PF3D7_0523000/1-1419 1066 S L F T F I T G S Y A G K L M S L K G D S E N A K L S F E K Y P L M I R K S N I D V R D O G G I R I N K - N L I K G K V D I K D V N F R Y I S R P N V P I Y K N L S F T C D S K K T T A I V G E T G S G K S T F M N L 1173

PmUG01_10021600/1-1461 1199 L M R F Y D I K N D H I F K N D T I K N K S N D I G V T E E G A D M E G G G I P M N A D E F N V G S K E R Y V D D D D N N K Y T L F K N G S I L L D D I N D Y N L K D L R S L F S I V S Q E P M L F N M S I 1307
PF3D7_0523000/1-1419 1174 L L R F Y D L K N D H I I L K N D M T N F O D Y Q N - - - - - N N N N S L V L K N V N - - - - - E F S N Q S G S A E D Y T V E N N N G E I L L D D I N N C D Y N L R D L R L N F S I V S Q E P M L F N M S I 1265

PmUG01_10021600/1-1461 1308 Y E N I K F G K D D A T L E D V K R V C K F A A I D E F I E S L P N K Y D T N V G P Y G K L S G G Q K O R I A I A R A L L R E P K I L L D E A T S S L D S N S E K L I E K T I V D I K D R G D K T I I T I A H R I A S 1416
PF3D7_0523000/1-1419 1266 Y E N I K F G R E D A T L E E D V K R V S K F A A I D E F I E S L P N K Y D T N V G P Y G S L S G G Q K O R I A I A R A L L R E P K I L L D E A T S S L D S N S E K L I E K T I V D I K D K A D K T I I T I A H R I A S 1374

PmUG01_10021600/1-1461 1417 I K R S D R I V V L N N P D R L G S Y V Q S G T H E L L A E Q D G I Y K K Y V K L A K 1461
PF3D7_0523000/1-1419 1375 I K R S D K I V V F L N N P D R N G T F V Q S H G T H D E L L S A Q D G I Y K K Y V K L A K 1419
```

**S7 Fig. Substitutions within *P. malariae* orthologs of drug resistance-associated loci in *P. falciparum*.**

Amino acid sequences aligned using Clustal Omega. Regions that are conserved between the two positions are highlighted in grey. Positions associated with drug resistance mutations within *P. falciparum* are highlighted in red. Predicted amino acid substitutions found in our *P. malariae* sample set are highlighted in blue. **A)** *PMDHFR* and *PFDHFR*. Both positions 57-58 and 114 within *PMDHFR* lie close to amino acid alterations associated with drug resistance in *P. falciparum* (C59R and S108N/T). **B)** *PMMDR1* and *PFMDR1*. The amino acid substitution at position 1,063 within PmUG01\_10021600.1 lies in close proximity to the N1042D substitution associated with quinine resistance.



**S1 Table. Pmset1 primers.** The sequences primers within Pmset1 are demonstrated. The asterisk in the primer sequence denotes the position of a phosphorothioate bond which inhibits primer degradation. Binding sites within the human genome were calculated using the human GRCh37 genome sequence available at <http://grch37.ensembl.org> and binding sites within the *P. malariae* genome were calculated using the PmUG01 reference genome available at <https://plasmodb.org>.

| Primer set    | Primer sequence            | Binding sites in human genome | Binding sites in <i>P. malariae</i> genome |
|---------------|----------------------------|-------------------------------|--------------------------------------------|
| <b>Pmset1</b> | TATGTATA*T*T               | 6054                          | 3057                                       |
|               | TTATTC*G*T                 | 3475                          | 3040                                       |
|               | TTCGTT*A*T                 | 4381                          | 3088                                       |
|               | TTTTTA*C*G                 | 3991                          | 3863                                       |
|               | TATTC*G*T                  | 3961                          | 3863                                       |
|               | <b>Total Binding Sites</b> | <b>21862</b>                  | <b>16521</b>                               |

**S2 Table. Sequencing statistics for all samples.** Sequence analysis data for all samples. Samples highlighted in grey are comparative samples before SWGA, this is also indicated in the 'Amplification' column. Samples that were excluded due to poor quality and not used in downstream population genetics analysis are labelled with an (E). Accession codes are given for each sample and can be found using the project code (PRJEB37746). Multiplicity of infection (MOI) was calculated using estMOI and the percentage of reads supporting a MOI>1 are given.

| Sample           | Accession code | Country  | Amplified DNA | Pm CT-value (qPCR data) | Parasites/ul (% Parasitaemia) | Total reads | Mapped reads | % Mapped reads | % Genome coverage $\geq 5$ | % Genome coverage $\geq 10$ | Mean coverage | Mean genic coverage | Median genic coverage | Mean intergenic coverage | Median intergenic coverage | Mean mitochondria coverage | Unfiltered SNPs | Core SNPs filtered | % Genome with MOI>1 |
|------------------|----------------|----------|---------------|-------------------------|-------------------------------|-------------|--------------|----------------|----------------------------|-----------------------------|---------------|---------------------|-----------------------|--------------------------|----------------------------|----------------------------|-----------------|--------------------|---------------------|
| PM_THA_001 (E)   | /              | Thailand | No_SWGA       | 31.74                   | 256 (0.0064)                  | 6264676     | 1005761      | 16.05          | 0.86                       | 0.12                        | 0.45          | 0.44                | 0                     | 0.47                     | 0                          | /                          | 3               | /                  | /                   |
| PM_THA_001       | ERS4423439     | Thailand | SWGA          | 31.74                   | 256 (0.0064)                  | 7174584     | 3154695      | 43.97          | 44.17                      | 25.28                       | 8.57          | 6                   | 3                     | 11                       | 4                          | 23.78                      | 41962           | 3256               | 0                   |
| PM_THA_002 (E)   | /              | Thailand | No_SWGA       | 27.73                   | 576 (0.0144)                  | 5073136     | 419922       | 8.28           | 5.01                       | 0.45                        | 1.25          | 1.66                | 1                     | 0.89                     | 0                          | /                          | 49              | /                  | /                   |
| PM_THA_002       | ERS4423440     | Thailand | SWGA          | 27.73                   | 576 (0.0144)                  | 8036914     | 4250708      | 52.89          | 64.06                      | 36.16                       | 12.59         | 16                  | 7                     | 10                       | 6                          | 338.52                     | 43237           | 6089               | 0                   |
| PM_THA_003       | ERS4423441     | Thailand | SWGA          | 30.59                   | 8096 (0.2024)                 | 7852281     | 4215247      | 53.68          | 63.46                      | 40.97                       | 14.63         | 13                  | 6                     | 16                       | 8                          | 3789.74                    | 45869           | 6567               | 2.10                |
| PM_THA_005       | ERS4423442     | Thailand | SWGA          | 23.60                   | 6464 (0.1616)                 | 8028153     | 5735625      | 71.44          | 88.31                      | 72.65                       | 22.68         | 23                  | 18                    | 22                       | 15                         | 1533.33                    | 57182           | 9998               | 2.36                |
| PM_THA_006       | ERS4423443     | Thailand | SWGA          | 23.72                   | 5312 (0.1328)                 | 5584655     | 5130545      | 91.87          | 75.09                      | 53.23                       | 19.13         | 14                  | 9                     | 24                       | 12                         | 238.56                     | 56707           | 6826               | 0                   |
| PM_THA_009a* (E) | ERS4423444     | Thailand | SWGA          | 31.20                   | 64 (0.0016)                   | 3684878     | 2765795      | 75.06          | 44.05                      | 25.70                       | 9.28          | 7                   | 3                     | 11                       | 4                          | /                          | 43853           | /                  | 0                   |
| PM_THA_009b* (E) | ERS4423445     | Thailand | SWGA          | 31.20                   | 64 (0.0016)                   | 2868636     | 2327144      | 81.12          | 27.32                      | 15.84                       | 6.41          | 4                   | 1                     | 8                        | 2                          | /                          | 37417           | /                  | 0                   |
| PM_THA_009_com   | ERS4423446     | Thailand | SWGA          | 31.20                   | 64 (0.0016)                   | 6553515     | 5092953      | 77.71          | 52.44                      | 34.66                       | 15.69         | 11                  | 4                     | 20                       | 6                          | 294.51                     | 48212           | 4698               | 0                   |
| PM_THA_010       | ERS4423447     | Thailand | SWGA          | 23.28                   | 1648 (0.0412)                 | 6934812     | 4135980      | 59.64          | 83.89                      | 62.05                       | 16.49         | 16                  | 13                    | 17                       | 12                         | 884.78                     | 43804           | 9042               | 0                   |

|                |            |              |      |       |              |         |         |       |       |       |       |    |    |    |    |        |       |      |       |
|----------------|------------|--------------|------|-------|--------------|---------|---------|-------|-------|-------|-------|----|----|----|----|--------|-------|------|-------|
| PM_THA_011     | ERS4423448 | Thailand     | SWGA | 25.20 | 16 (0.0004)  | 6179776 | 2257408 | 36.53 | 63.10 | 31.03 | 8.47  | 8  | 7  | 9  | 6  | 164.40 | 43804 | 5629 | 0     |
| PM_THA_012     | ERS4423449 | Thailand     | SWGA | 24.42 | 544 (0.0136) | 6909366 | 3264421 | 47.25 | 78.03 | 50.69 | 12.71 | 13 | 10 | 13 | 9  | 414.93 | 52348 | 8147 | 17.46 |
| PM_KEN_001     | ERS4423432 | Kenya        | SWGA | /     | /            | 5709031 | 3454616 | 60.51 | 72.05 | 44.58 | 12.03 | 11 | 8  | 13 | 9  | 59.60  | 50899 | 4820 | /     |
| PM_KEN_003     | ERS4423433 | Kenya        | SWGA | /     | /            | 6744405 | 2186998 | 32.43 | 53.11 | 24.02 | 7.44  | 7  | 5  | 8  | 5  | 28.76  | 44678 | 3400 | 0     |
| PM_LBR_002     | ERS4423434 | Liberia      | SWGA | /     | /            | 7180349 | 4242520 | 59.09 | 86.46 | 66.06 | 17.10 | 17 | 14 | 17 | 13 | 309.94 | 63484 | 8474 | 7.88  |
| PM_LBR_003 (E) | ERS4423435 | Liberia      | SWGA | /     | /            | 9338062 | 5627043 | 60.26 | 0.07  | 0.03  | 0.19  | 0  | 0  | 0  | 0  | /      | 25    | /    | /     |
| PM_SDN_001     | ERS4423436 | Sudan        | SWGA | /     | /            | 5369713 | 4461837 | 83.09 | 72.52 | 50.32 | 16.96 | 13 | 8  | 20 | 11 | 419.30 | 54943 | 5154 | 0     |
| PM_SLE_002     | ERS4423437 | Sierra Leone | SWGA | /     | /            | 8039293 | 4286570 | 53.32 | 84.15 | 62.52 | 16.46 | 17 | 13 | 16 | 12 | 258.93 | 53739 | 7034 | 5.61  |
| PM_SLE_004     | ERS4423438 | Sierra Leone | SWGA | /     | /            | 6933075 | 1513093 | 21.82 | 44.96 | 14.67 | 5.35  | 6  | 4  | 5  | 4  | 184.48 | 28204 | 2554 | 0     |
| PM_UGA_001     | ERS4423451 | Uganda       | SWGA | /     | /            | 2846843 | 1666685 | 58.55 | 46.56 | 17.59 | 5.90  | 5  | 4  | 6  | 4  | 50.56  | 37419 | 2534 | /     |
| PM_UGA_003     | ERS4423452 | Uganda       | SWGA | /     | /            | 6500133 | 3316826 | 51.03 | 81.84 | 53.76 | 13.22 | 13 | 11 | 13 | 10 | 373.45 | 53571 | 6525 | 3.23  |
| PM_UGA_007     | ERS4423453 | Uganda       | SWGA | /     | /            | 6673599 | 2481168 | 37.18 | 58.43 | 32.44 | 9.48  | 9  | 6  | 10 | 6  | 87.20  | 48414 | 3836 | 25.64 |

**S3 Table. Identification of core nuclear genome positions.** Not all chromosomes have annotated *Pm-fam* genes or hypervariable regions at both ends of the chromosomes, these chromosomes are indicated with an asterisk.

| <b>Chromosome</b> | <b>Start</b> | <b>End</b> | <b>Classification</b> |
|-------------------|--------------|------------|-----------------------|
| PmUG01_01_v1      | 0            | 194999     | Hypervariable         |
| PmUG01_01_v1      | 195000       | 1125000    | Core                  |
| PmUG01_01_v1      | 1125001      | 1381517    | Hypervariable         |
| PmUG01_02_v1*     | 0            | 59999      | Hypervariable         |
| PmUG01_02_v1*     | 60000        | 813519     | Core                  |
| PmUG01_03_v1      | 0            | 89999      | Hypervariable         |
| PmUG01_03_v1      | 90000        | 1105000    | Core                  |
| PmUG01_03_v1      | 1105001      | 1341933    | Hypervariable         |
| PmUG01_04_v1*     | 0            | 143680     | Hypervariable         |
| PmUG01_04_v1*     | 143681       | 1076824    | Core                  |
| PmUG01_05_v1      | 0            | 399999     | Hypervariable         |
| PmUG01_05_v1      | 400000       | 1665000    | Core                  |
| PmUG01_05_v1      | 1665001      | 1887011    | Hypervariable         |
| PmUG01_06_v1*     | 0            | 705000     | Core                  |
| PmUG01_06_v1*     | 705001       | 862289     | Hypervariable         |
| PmUG01_07_v1      | 0            | 221927     | Hypervariable         |
| PmUG01_07_v1      | 221928       | 1875000    | Core                  |
| PmUG01_07_v1      | 1875001      | 2080590    | Hypervariable         |
| PmUG01_08_v1      | 0            | 364999     | Hypervariable         |
| PmUG01_08_v1      | 365000       | 2050000    | Core                  |
| PmUG01_08_v1      | 2050000      | 2818517    | Hypervariable         |
| PmUG01_09_v1*     | 0            | 164999     | Hypervariable         |
| PmUG01_09_v1*     | 165000       | 2312276    | Core                  |
| PmUG01_10_v1      | 0            | 199999     | Hypervariable         |
| PmUG01_10_v1      | 200000       | 1854000    | Core                  |
| PmUG01_10_v1      | 1854001      | 2219074    | Hypervariable         |
| PmUG01_11_v1      | 0            | 344999     | Hypervariable         |
| PmUG01_11_v1      | 345000       | 2644881    | Core                  |
| PmUG01_11_v1      | 2644882      | 2721161    | Hypervariable         |
| PmUG01_12_v1*     | 0            | 89999      | Hypervariable         |
| PmUG01_12_v1*     | 90000        | 3436769    | Core                  |
| PmUG01_13_v1      | 0            | 42699      | Hypervariable         |
| PmUG01_13_v1      | 42700        | 2410000    | Core                  |
| PmUG01_13_v1      | 2410001      | 3023685    | Hypervariable         |
| PmUG01_14_v1      | 0            | 350186     | Hypervariable         |
| PmUG01_14_v1      | 350187       | 3564280    | Core                  |

**S4 Table. Pairwise genome-wide nucleotide diversity ( $\pi$ ;  $\times 10^{-4}$ ).** Nucleotide diversity values are coloured to demonstrate samples with high or low diversity in comparison to other samples. Low diversity is shaded in yellow and pale orange, increasing to darker orange for high diversity (yellow for 0 to 1, pale orange for 1 to 2, medium orange for 1 to 2, and dark orange for 2 to 4; all  $\times 10^{-4}$ ).

| Region      |               | Thailand   |            |            |            |            |               |            |            |            | East Africa |            |            |            |            |            | West Africa |            |            |
|-------------|---------------|------------|------------|------------|------------|------------|---------------|------------|------------|------------|-------------|------------|------------|------------|------------|------------|-------------|------------|------------|
|             | Samples       | PM_THA_001 | PM_THA_002 | PM_THA_003 | PM_THA_005 | PM_THA_006 | PM_THA_009com | PM_THA_010 | PM_THA_011 | PM_THA_012 | PM_KEN_001  | PM_KEN_003 | PM_UGA_001 | PM_UGA_003 | PM_UGA_007 | PM_SDN_001 | PM_LBR_002  | PM_SLE_002 | PM_SLE_004 |
| Thailand    | PM_THA_001    | /          | 2.1        | 2.23       | 2.29       | 2.04       | 1.75          | 1.99       | 1.64       | 1.87       | 2.75        | 2.79       | 2.35       | 2.91       | 2.64       | 2.72       | 3           | 3.05       | 2.41       |
|             | PM_THA_002    | 2.1        | /          | 0.36       | 2.52       | 2.16       | 2.13          | 2.32       | 2.04       | 1.94       | 3.06        | 3.1        | 2.59       | 3.19       | 2.91       | 3.08       | 3.26        | 3.33       | 2.75       |
|             | PM_THA_003    | 2.23       | 0.36       | /          | 2.52       | 2.25       | 2.18          | 2.34       | 2.1        | 1.98       | 3.12        | 3.12       | 2.67       | 3.21       | 2.96       | 3.12       | 3.25        | 3.3        | 2.74       |
|             | PM_THA_005    | 2.29       | 2.52       | 2.52       | /          | 2.38       | 2.21          | 2.49       | 2.18       | 2.1        | 3.25        | 3.26       | 2.95       | 3.53       | 3.17       | 3.37       | 3.64        | 3.68       | 3.06       |
|             | PM_THA_006    | 2.04       | 2.16       | 2.25       | 2.38       | /          | 1.99          | 2.38       | 2.17       | 2.17       | 2.91        | 2.98       | 2.55       | 3.05       | 2.85       | 2.9        | 3.26        | 3.27       | 2.68       |
|             | PM_THA_009com | 1.75       | 2.13       | 2.18       | 2.21       | 1.99       | /             | 2.13       | 1.4        | 2.07       | 2.8         | 2.88       | 2.43       | 2.98       | 2.82       | 2.83       | 3.11        | 3.14       | 2.62       |
|             | PM_THA_010    | 1.99       | 2.32       | 2.34       | 2.49       | 2.38       | 2.13          | /          | 1.94       | 2.23       | 3.22        | 3.24       | 2.78       | 3.39       | 3.11       | 3.26       | 3.44        | 3.55       | 2.89       |
|             | PM_THA_011    | 1.64       | 2.04       | 2.1        | 2.18       | 2.17       | 1.4           | 1.94       | /          | 2.03       | 2.91        | 2.92       | 2.55       | 3.07       | 2.78       | 2.89       | 3.08        | 3.26       | 2.57       |
|             | PM_THA_012    | 1.87       | 1.94       | 1.98       | 2.1        | 2.17       | 2.07          | 2.23       | 2.03       | /          | 3.08        | 3.06       | 2.67       | 3.2        | 2.91       | 3.09       | 3.23        | 3.38       | 2.72       |
| East Africa | PM_KEN_001    | 2.75       | 3.06       | 3.12       | 3.25       | 2.91       | 2.8           | 3.22       | 2.91       | 3.08       | /           | 0.27       | 1.87       | 2.45       | 2.09       | 2.26       | 2.48        | 2.43       | 1.89       |
|             | PM_KEN_003    | 2.79       | 3.1        | 3.12       | 3.26       | 2.98       | 2.88          | 3.24       | 2.92       | 3.06       | 0.27        | /          | 1.93       | 2.4        | 2.08       | 2.33       | 2.5         | 2.47       | 1.89       |
|             | PM_UGA_001    | 2.35       | 2.59       | 2.67       | 2.95       | 2.55       | 2.43          | 2.78       | 2.55       | 2.67       | 1.87        | 1.93       | /          | 2.07       | 1.86       | 1.94       | 2.11        | 2.17       | 1.69       |
|             | PM_UGA_003    | 2.91       | 3.19       | 3.21       | 3.53       | 3.05       | 2.98          | 3.39       | 3.07       | 3.2        | 2.45        | 2.4        | 2.07       | /          | 2.2        | 2.45       | 2.71        | 2.78       | 2.19       |
|             | PM_UGA_007    | 2.64       | 2.91       | 2.96       | 3.17       | 2.85       | 2.82          | 3.11       | 2.78       | 2.91       | 2.09        | 2.08       | 1.86       | 2.2        | /          | 2.15       | 2.34        | 2.38       | 1.88       |
|             | PM_SDN_001    | 2.72       | 3.08       | 3.12       | 3.37       | 2.9        | 2.83          | 3.26       | 2.89       | 3.09       | 2.26        | 2.33       | 1.94       | 2.45       | 2.15       | /          | 2.47        | 2.59       | 2.01       |
| West Africa | PM_LBR_002    | 3          | 3.26       | 3.25       | 3.64       | 3.26       | 3.11          | 3.44       | 3.08       | 3.23       | 2.48        | 2.5        | 2.11       | 2.71       | 2.34       | 2.47       | /           | 2.71       | 2.09       |
|             | PM_SLE_002    | 3.05       | 3.33       | 3.3        | 3.68       | 3.27       | 3.14          | 3.55       | 3.26       | 3.38       | 2.43        | 2.47       | 2.17       | 2.78       | 2.38       | 2.59       | 2.71        | /          | 2.06       |
|             | PM_SLE_004    | 2.41       | 2.75       | 2.74       | 3.06       | 2.68       | 2.62          | 2.89       | 2.57       | 2.72       | 1.89        | 1.89       | 1.69       | 2.19       | 1.88       | 2.01       | 2.09        | 2.06       | /          |

**S5 Table. Drug resistance associated genes in *P. falciparum* and their known orthologs in *P. malariae*.**

| Gene             | <i>P. falciparum</i> (3D7) |               | <i>P. malariae</i> (UG01) |               |
|------------------|----------------------------|---------------|---------------------------|---------------|
|                  | Gene ID                    | Paper code    | Gene ID                   | Paper code    |
| <i>crt</i>       | PF3D7_070900               | <i>Pfcrt</i>  | PmUG01_01020700           | <i>Pmcrt</i>  |
| <i>dhfr-ts</i>   | PF3D7_0417200              | <i>Pfdhfr</i> | PmUG01_05034700           | <i>Pmdhfr</i> |
| <i>pppk-dhps</i> | PF3D7_0810800              | <i>Pfdhps</i> | PmUG01_14045500           | <i>Pmdhps</i> |
| <i>mdr1</i>      | PF3D7_052300               | <i>Pfmdr1</i> | PmUG01_10021600           | <i>Pmmdr1</i> |
| <i>kelch13</i>   | PF3D7_1343700              | <i>Pfk13</i>  | PmUG01_12021200           | <i>Pmk13</i>  |

**S6 Table. WGS data from mixed infections.** Four samples with mixed infections (multiple species) were sequenced and mapped to their respective reference genomes. The proportion of each parasite present was analysed using qPCR and the resulting cycle thresholds (CTs) are given. The following reference genomes are used: *P. malariae* (PmUG01), *P. vivax* (PvP01, [https://plasmodb.org/common/downloads/Current\\_Release/PvivaxP01/fasta/data/](https://plasmodb.org/common/downloads/Current_Release/PvivaxP01/fasta/data/)) *P. ovale curtisi* (PocGh01, [https://plasmodb.org/common/downloads/Current\\_Release/PovalecurtisiGH01/fasta/data/](https://plasmodb.org/common/downloads/Current_Release/PovalecurtisiGH01/fasta/data/)), *P. ovale wallikeri* (PowCR01 <https://www.ebi.ac.uk/ena/data/view/ERS1452913>).

| Sample     | Mapped_to | Pf_CT | Po_CT | Pm_C_RT | Pv_C_RT | Parasites/ul (%Parasitemia) | Total_reads | Map_reads | %_Mapped_reads | %_Genome_cov5 | %_Genome_cov10 |
|------------|-----------|-------|-------|---------|---------|-----------------------------|-------------|-----------|----------------|---------------|----------------|
| PM_THA_004 | PmUG01    | /     | /     | 23.48   | 31.02   | 1520 (0.038)                | 7644777     | 4619930   | 60.433         | 85.004        | 66.919         |
| PM_THA_004 | PvP01     | /     | /     | 23.48   | 31.02   | 1520 (0.038)                | 7644777     | 37351     | 0.489          | 0.015         | 0.010          |
| PM_THA_008 | PmUG01    | /     | 29.33 | 31.12   | 29.26   | 192 (0.0048)                | 3679905     | 305249    | 3.993          | 0.072         | 0.023          |
| PM_THA_008 | PocGH01   | /     | 29.33 | 31.12   | 29.26   | 192 (0.0048)                | 3679905     | 1540021   | 41.849         | 25.825        | 15.677         |
| PM_THA_008 | PowENA    | /     | 29.33 | 31.12   | 29.26   | 192 (0.0048)                | 3679905     | 117162    | 3.184          | 0.169         | 0.100          |
| PM_THA_008 | PvP01     | /     | 29.33 | 31.12   | 29.26   | 192 (0.0048)                | 3679905     | 242561    | 6.592          | 0.046         | 0.024          |
| PM_THA_013 | PmUG01    | /     | 33.43 | 26.31   | /       | 4560 (0.114)                | 7533858     | 3928080   | 52.139         | 83.985        | 61.240         |
| PM_THA_013 | PocGH01   | /     | 33.43 | 26.31   | /       | 4560 (0.114)                | 7533858     | 106192    | 1.410          | 0.035         | 0.014          |
| PM_THA_013 | PowENA    | /     | 33.43 | 26.31   | /       | 4560 (0.114)                | 7533858     | 48638     | 0.646          | 0.034         | 0.018          |
| PM_THA_020 | PmUG01    | /     | 26.72 | 28.33   | 26.70   | 4880 (0.122)                | 6917577     | 236151    | 3.414          | 0.048         | 0.020          |
| PM_THA_020 | PocGH01   | /     | 26.72 | 28.33   | 26.70   | 4880 (0.122)                | 6917577     | 2605168   | 37.660         | 23.871        | 20.314         |
| PM_THA_020 | PowENA    | /     | 26.72 | 28.33   | 26.70   | 4880 (0.122)                | 6917577     | 895565    | 12.946         | 28.435        | 12.095         |
| PM_THA_020 | PvP01     | /     | 26.72 | 28.33   | 26.70   | 4880 (0.122)                | 6917577     | 391155    | 5.655          | 0.046         | 0.038          |
